# Supplementary material
Source: MDPI journal article supplement (https://www.mdpi.com/1999-4907/9/10/595)
Supplement: s1 [file s1]

## Supplemental Material for Holtz and Schoettle

**Table S1.** Mean metrics per year over a 20 year interval from 1996 to 2015 for R and S trees from the extracted limber pine cores.

| Variable                                                | <i>n</i> |    | Mean (SE)     |               |
|---------------------------------------------------------|----------|----|---------------|---------------|
|                                                         | R        | S  | R             | S             |
| Radial ring width (mm)                                  | 49       | 44 | 0.895 (0.064) | 0.779 (0.069) |
| No. Vertical Ducts (no. year <sup>-1</sup> )            | 43       | 40 | 3.974 (0.234) | 3.575 (0.221) |
| Total Duct Area (mm <sup>2</sup> year <sup>-1</sup> )   | 43       | 40 | 0.071 (0.004) | 0.062 (0.004) |
| Duct Density (no. mm <sup>-2</sup> year <sup>-1</sup> ) | 49       | 44 | 0.843 (0.037) | 0.941 (0.048) |
| Relative Duct Area (% annual ring)                      | 49       | 44 | 1.428 (0.041) | 1.536 (0.067) |

**Table S2.** Regression statistics for growth and resin duct traits over a 10 year interval from 2001 to 2010 for R and S trees from the extracted limber pine cores as a function of elevation.

| Trait                                                   |                       | R Trees | S Trees | All Trees |
|---------------------------------------------------------|-----------------------|---------|---------|-----------|
| Radial ring width (mm)                                  | <i>R</i> <sup>2</sup> | 0.11    | 0.21    | 0.15      |
|                                                         | <i>p</i>              | 0.0273  | 0.0031  | 0.0003    |
|                                                         | <i>n</i>              | 49      | 44      | 93        |
| No. Vertical Ducts (no. year <sup>-1</sup> )            | <i>R</i> <sup>2</sup> | 0.23    | 0.14    | 0.19      |
|                                                         | <i>p</i>              | 0.0012  | 0.0160  | <0.0001   |
|                                                         | <i>n</i>              | 43      | 40      | 83        |
| Total Duct Area (mm <sup>2</sup> year <sup>-1</sup> )   | <i>R</i> <sup>2</sup> | 0.16    | 0.09    | 0.12      |
|                                                         | <i>p</i>              | 0.0085  | 0.0588  | 0.0011    |
|                                                         | <i>n</i>              | 43      | 40      | 83        |
| Duct Density (no. mm <sup>-2</sup> year <sup>-1</sup> ) | <i>R</i> <sup>2</sup> | 0.0     | 0.08    | 0.02      |
|                                                         | <i>p</i>              | 0.8622  | 0.0590  | 0.2072    |
|                                                         | <i>n</i>              | 49      | 44      | 93        |
| Relative Duct Area<br>(% annual ring)                   | <i>R</i> <sup>2</sup> | 0.04    | 0.11    | 0.01      |
|                                                         | <i>p</i>              | 0.1651  | 0.0303  | 0.3599    |
|                                                         | <i>n</i>              | 49      | 44      | 93        |
